# Supplementary material for: Seven Ln(iii) coordination polymers with two kinds of geometric coordination but the same 3D topological property: luminescence sensing and magnetic property
Source: Royal Society of Chemistry journal article supplement (doi:10.1039/d2dt01024k), 2022-01-01
Supplement: d2dt01024k1.pdf [file d2dt01024k1.pdf]

## Seven Ln (III) Coordination Polymers with Two Kinds of Geometric Coordination but the Same 3D Topological Property: Luminescence Sensing and Magnetic Properties

Ai Wang,<sup>\*†a</sup> Yatong Zhang,<sup>a</sup> Liping Lu,<sup>\*a</sup> Miaoli Zhu,<sup>a,b</sup> Caixia Yuan<sup>a</sup> and Sisi Feng<sup>a,b</sup>

Fig. S1 IR spectra of complexes **1-7**.

Fig. S2 Coordination environment of the La<sup>3+</sup> ion in **1** (a), the Ce<sup>3+</sup> ion in **2** (b), the Nd<sup>3+</sup> ion in **3** (c), the Sm<sup>3+</sup> ion in **4** (d) and the Er<sup>3+</sup> ion in **7** (e).

Fig. S3 PXRD patterns of complexes **1-7**.

Fig. S4 TGA spectra of complexes **1-7**.

Fig. S5 Solid-state emission spectra of H<sub>2</sub>dttpa and complexes **1-7** with  $\lambda_{\text{ex}} = 311$  nm.

Fig. S6 Solid-state excitation (black line) and emission (red line) spectra of complex **5** ( $\lambda_{\text{ex}} = 311$  nm) at room temperature.

Fig. S7 Solid-state excitation (black line) and emission (red line) spectra of complex **6** ( $\lambda_{\text{ex}} = 311$  nm) at room temperature.

Fig. S8 The emission spectra of complex **5** in DAM and **6** in CH<sub>3</sub>CN with different excitation wavelengths.

Fig. S9 PXRD of recycled powders for complexes **5** (left) and **6** (right) from different pH detection systems.

Fig. S10 Fluorescence intensities of complexes **5** (Eu-CP with  $\lambda_{\text{ex}} = 278$  nm, left) and **6** (Tb-CP with  $\lambda_{\text{ex}} = 248$  nm, right) in different solvents.

Fig. S11 The stability for complex **5** in DMA within 7 days.

Fig. S12 PXRD of complex **5** and complex **5** in DMA and H<sub>2</sub>O for 7 days.

Fig. S13 (a) Luminescence responses of **5** (5.0 mg dispersed in 50.0 mL of DMA) toward different lanthanide cations solution ( $\lambda_{\text{ex}} = 278$  nm); (b) Luminescence intensity of **5** toward different lanthanide cations solution at 542 nm.

Fig. S14 Luminescence spectra of **5** in DMA (5.0 mg dispersed in 50.0 mL of DMA), complex **5** with additional Tb<sup>3+</sup>, ligand H<sub>2</sub>dttpa and Tb<sup>3+</sup> in DMA.

Fig. S15 PXRD of complex **5**, the solid samples after sensing Tb<sup>3+</sup> ions and after the 5 cycle experiments.

Fig. S16 The stability for complex **6** in CH<sub>3</sub>CN for 7 days.

Fig. S17 PXRD of complex **6** and complex **6** soaked in CH<sub>3</sub>CN and H<sub>2</sub>O for 7 days.

Fig. S18 (a) Interference study of complex **6** (Tb-CP) for sensing NB in the presence of other solvents; (b) Reproducibility of the quenching ability of **6** in CH<sub>3</sub>CN and in NB (60  $\mu$ M of NB).

Fig. S19 PXRD of complex **6**, the solid samples after sensing NB and after the 5 cycle experiments.

Fig. S20 The excitation and emission spectra of complex **5** in DMA ( $\lambda_{\text{ex}} = 278$  nm)

Fig. S21 The excitation and emission spectra of complex **5** in DMA plus Tb<sup>3+</sup> ( $\lambda_{\text{ex}} = 278$  nm with the maximum emission of Tb<sup>3+</sup>).

Fig. S22 Two-dimensional luminescence responses of compound **5** toward different concentrations of  $\text{TbCl}_3$  solution.

Fig. S23 UV-vis spectra of complex **6** and **6** after adding NB, 2-NT, 2-NP, 3-NT and 4-NT in  $\text{CH}_3\text{CN}$ .

Fig. S24 Energy gap of the HOMO and LUMO for  $\text{H}_2\text{dtpa}$  and NB.

Fig. S25 The excitation spectra of complex **6** in  $\text{CH}_3\text{CN}$  and **6** in  $\text{CH}_3\text{CN}$  after adding NB and 2-NT, respectively.

Fig. S26 Lifetime for  $^5\text{D}_4$  emission of **6** in  $\text{CH}_3\text{CN}$  and **6** in  $\text{CH}_3\text{CN}$  after adding NB, 2-NT, 2-NP, 3-NT and 4-NT.

Table S1 Crystal data and structure refinements for complexes **1-7**.

Table S2 The selected bond lengths and angles of all the complexes.

Table S3 Hydrogen-bond geometry ( $\text{\AA}$ ,  $^\circ$ ) for complexes **1-7**.

Table S4 Quantum yields of Eu-CP, Tb-CP and the compounds after loaded the analytes.

Table S5 The detection limitation of complex **5** in this paper and of previously reported compounds for the detection of  $\text{Tb}^{3+}$ .

Table S6 The detection limitation of complex **6** in this paper and of previously reported compounds for the detection of nitrobenzene (NB).

Table S7 Lifetime for  $^5\text{D}_4$  emission of **6** and after adding NB, 2-NT, 2-NP, 3-NT and 4-NT.

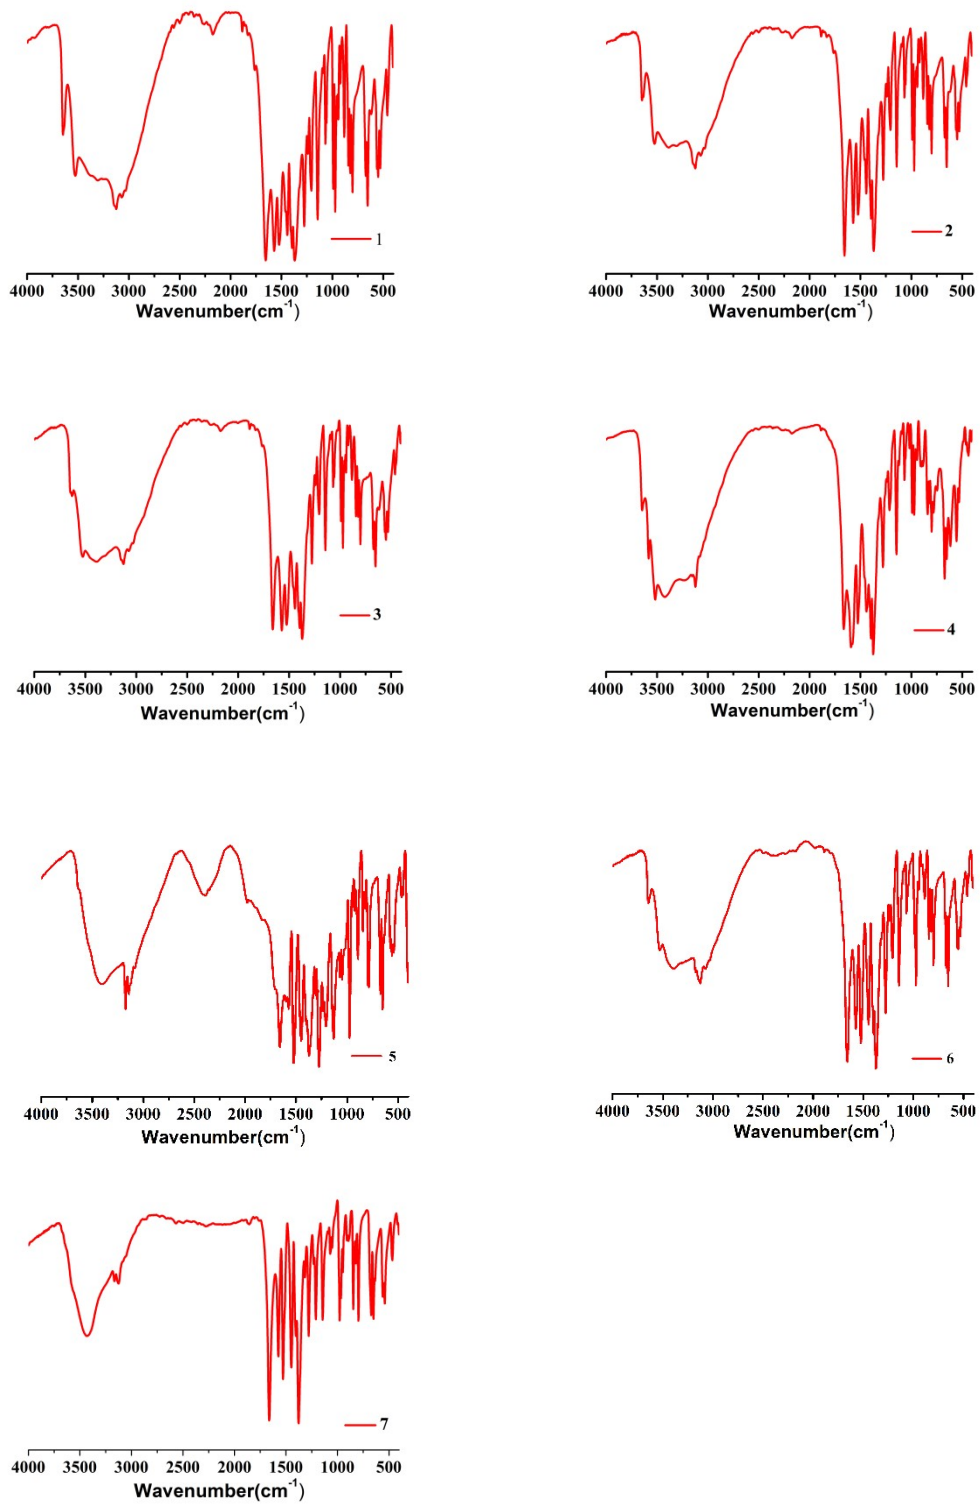

Fig. S1 IR spectra of complexes 1-7.

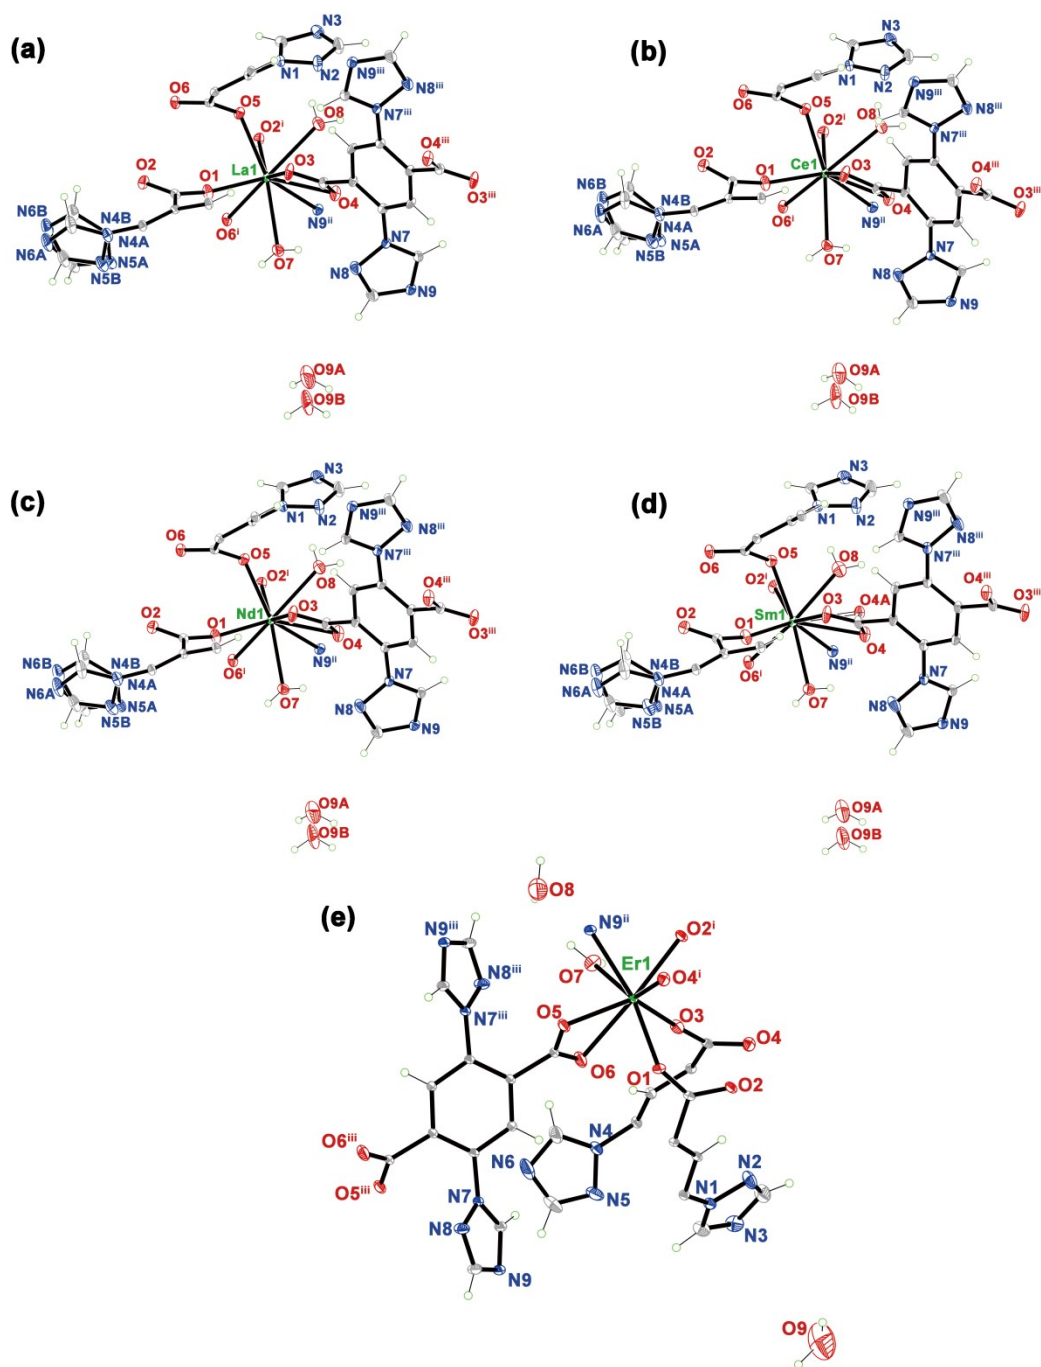

Fig. S2 Coordination environment of the La<sup>3+</sup> ion in 1 (a), the Ce<sup>3+</sup> ion in 2 (b), the Nd<sup>3+</sup> ion in 3 (c), the Sm<sup>3+</sup> ion in 4 (d) and the Er<sup>3+</sup> ion in 7 (e).

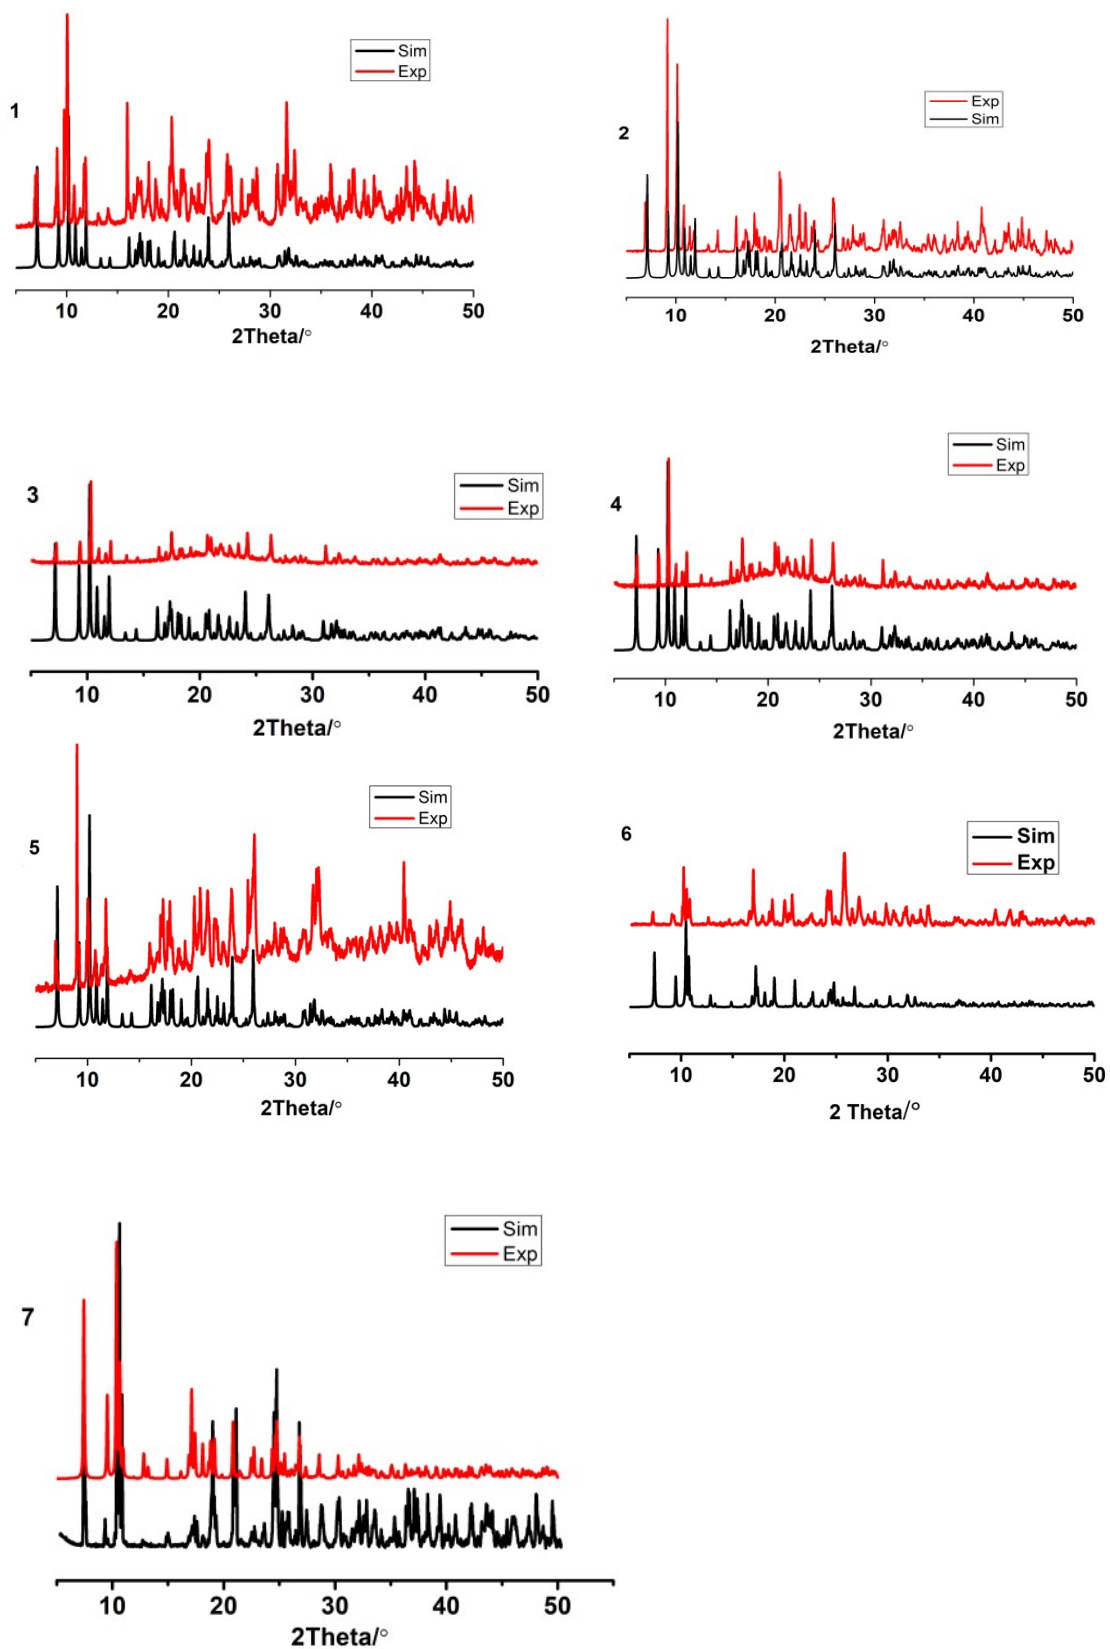

Fig. S3 PXR D patterns of complexes 1-7.

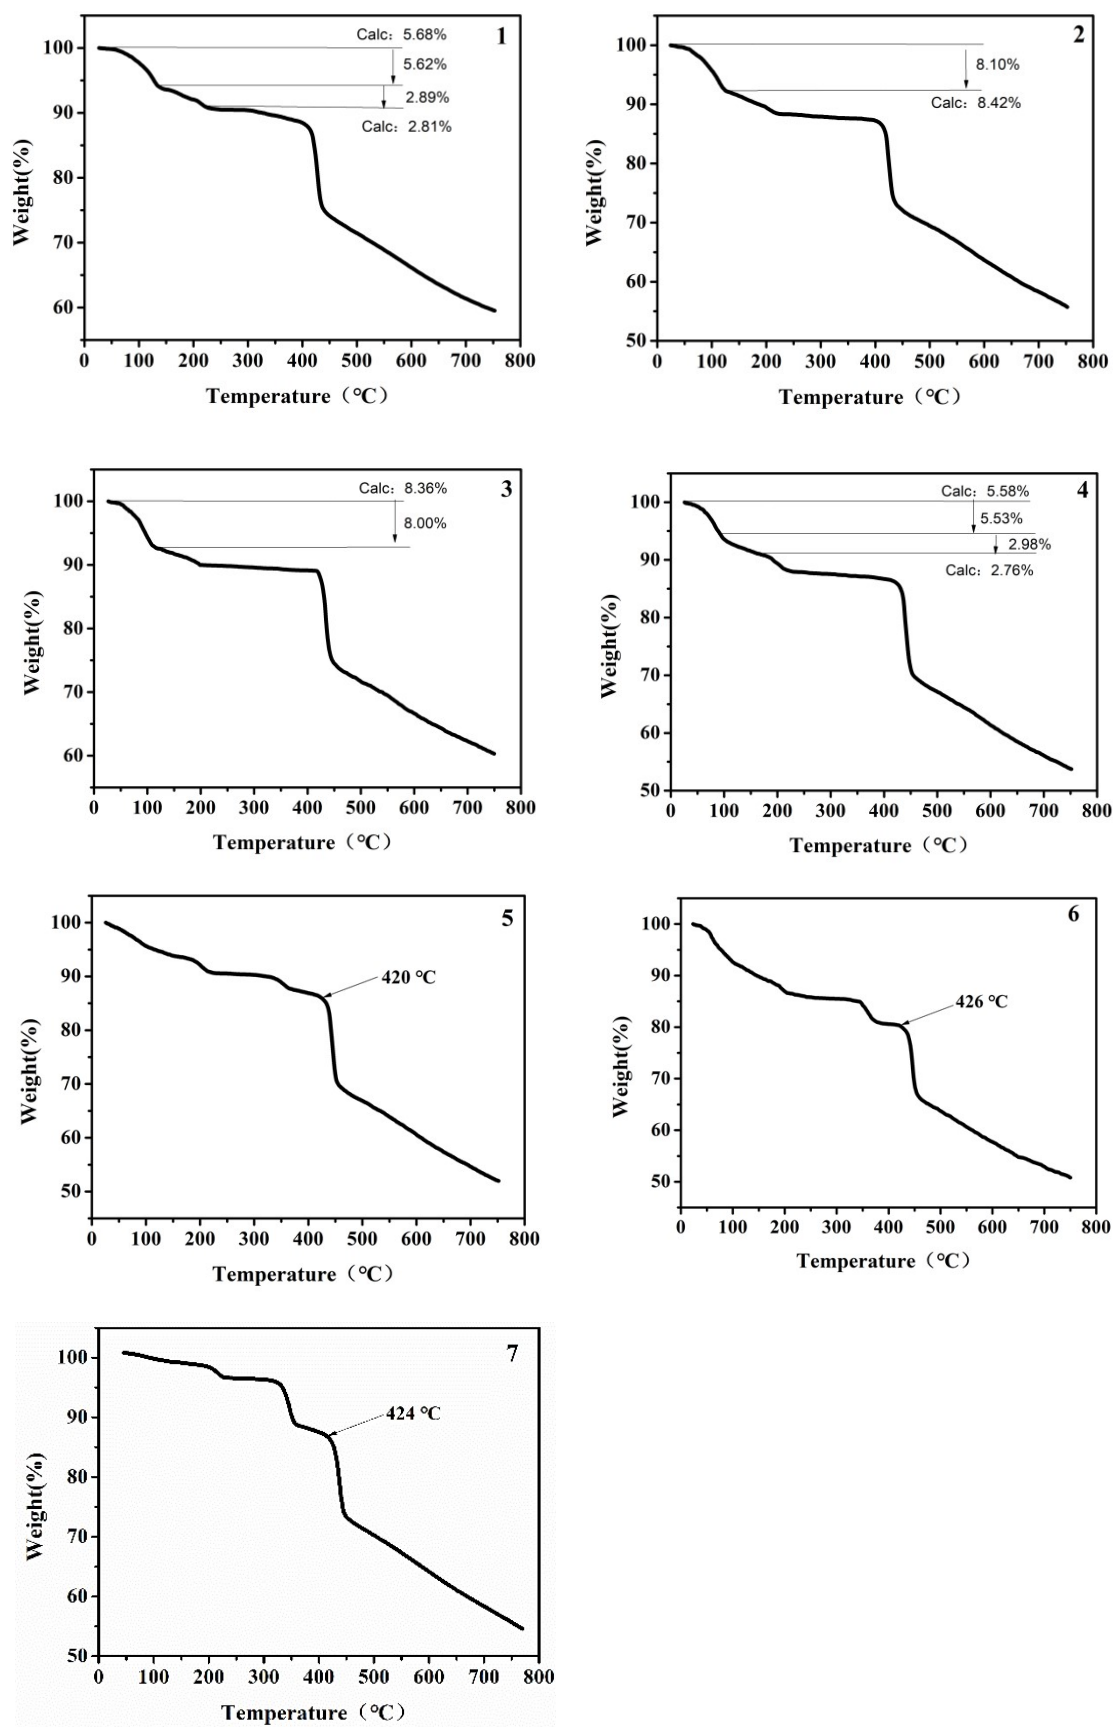

Fig. S4 TGA spectra of complexes 1-7.

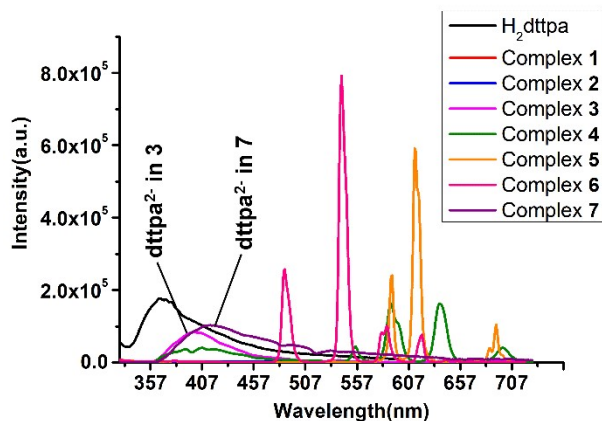

Fig. S5 Solid-state emission spectra of H<sub>2</sub>dttpa and complexes 1–7 with  $\lambda_{\text{ex}} = 311$  nm.

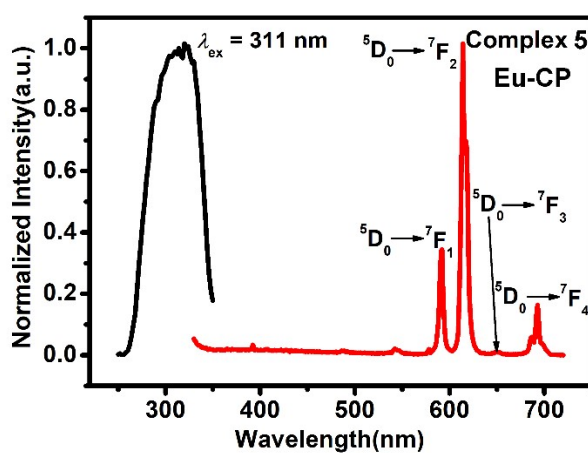

Fig. S6 Solid-state excitation (black line) and emission (red line) spectra of complex 5 ( $\lambda_{\text{ex}} = 311$  nm) at room temperature.

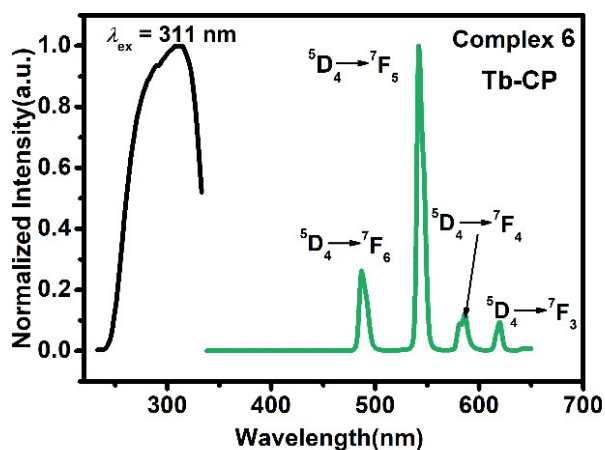

Fig. S7 Solid-state excitation (black line) and emission (green line) spectra of complex 6 ( $\lambda_{\text{ex}} = 311$  nm) at room temperature.

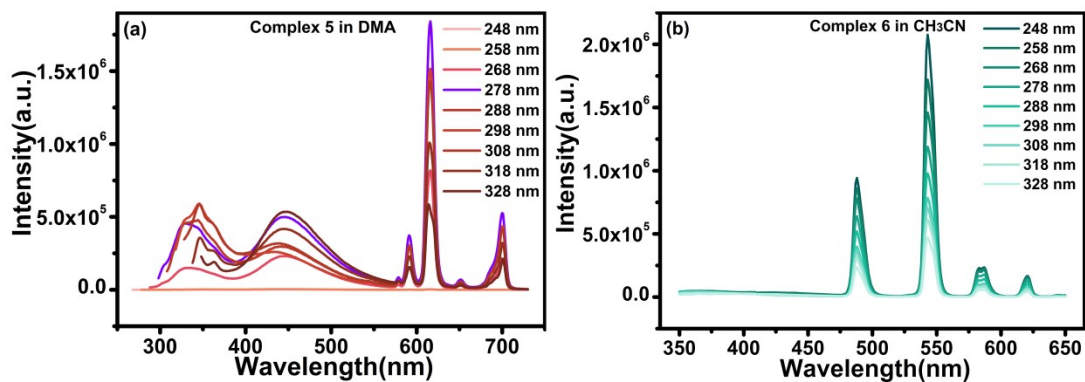

Fig. S8 The emission spectra of complex **5** in DMA (a) and **6** in CH<sub>3</sub>CN (b) with different excitation wavelengths.

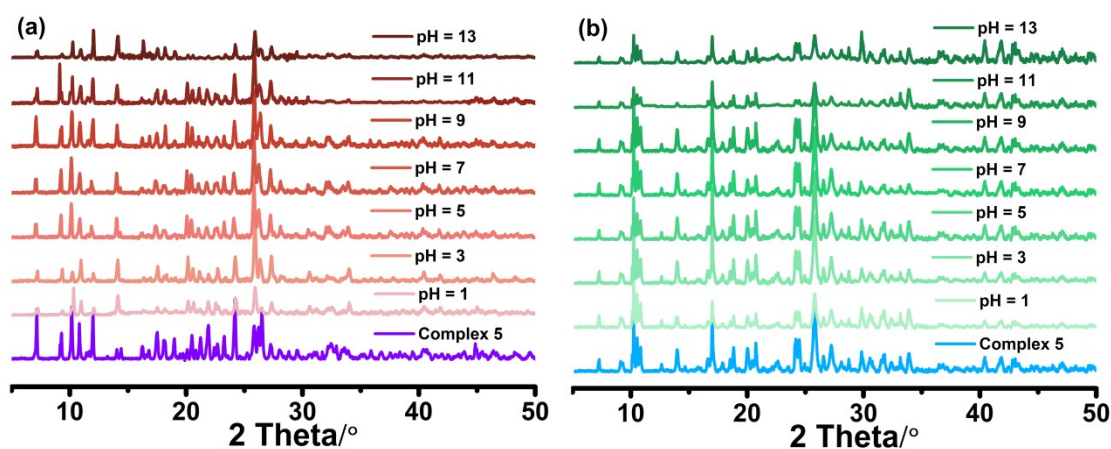

Fig. S9 PXRD of recycled powders for complexes **5** (a) and **6** (b) from different pH detection systems.

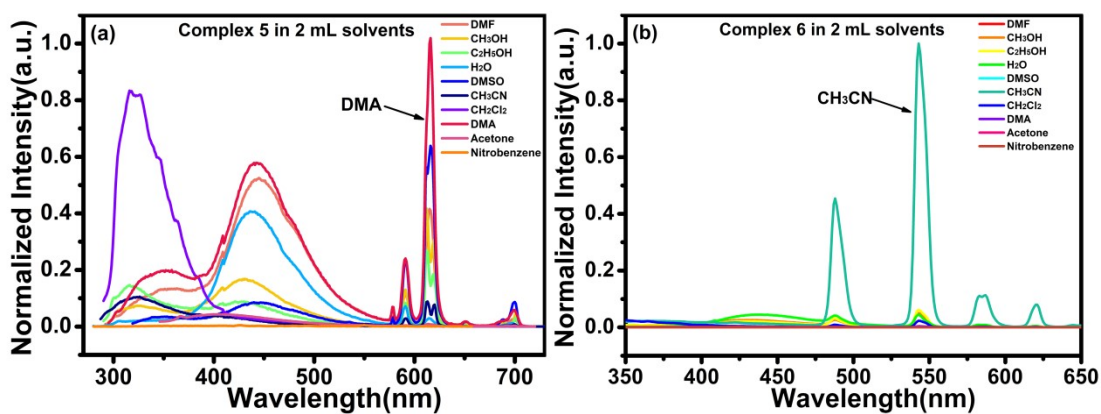

Fig. S10 (a) Fluorescence intensities of complex **5** ( $\lambda_{\text{ex}} = 278$  nm) and (b) complex **6** ( $\lambda_{\text{ex}} = 248$  nm) in different solvents.



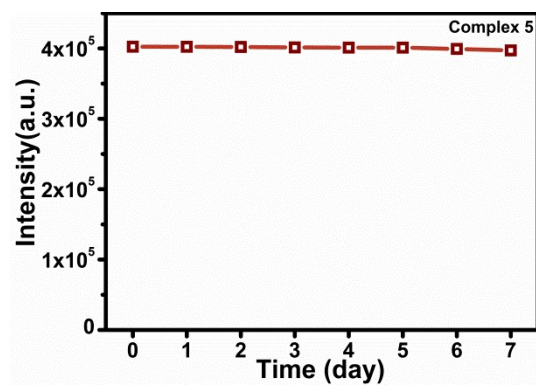

Fig. S11 The stability for complex **5** in DMA within 7 days.

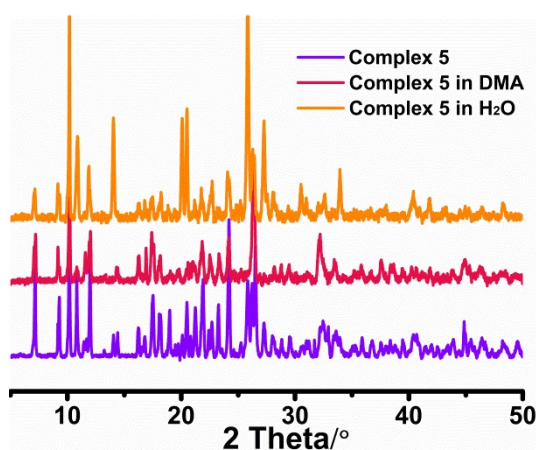

Fig. S12 PXR D of complex **5** and complex **5** in DMA and H<sub>2</sub>O for 7 days.

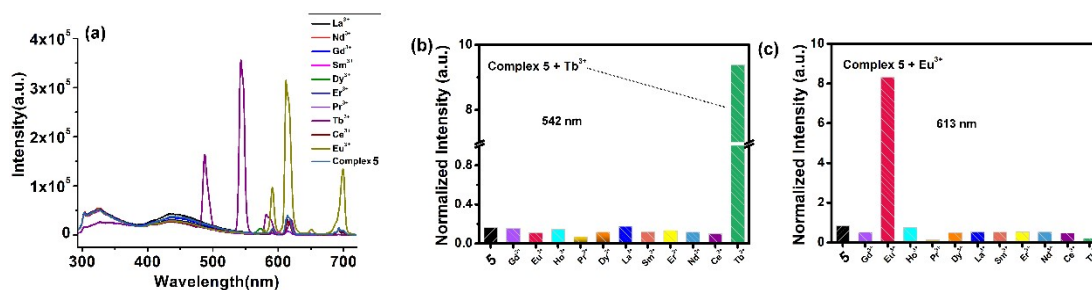

Fig. S13 (a) Luminescence responses of **5** (5.0 mg dispersed in 50.0 mL of DMA) toward different lanthanide cations solution ( $\lambda_{\text{ex}} = 278 \text{ nm}$ ); (b) Luminescence intensity of **5** with the additional different lanthanide cations solution at 542 nm; (c) Luminescence intensity of **5** with different lanthanide cations solution at 613 nm.

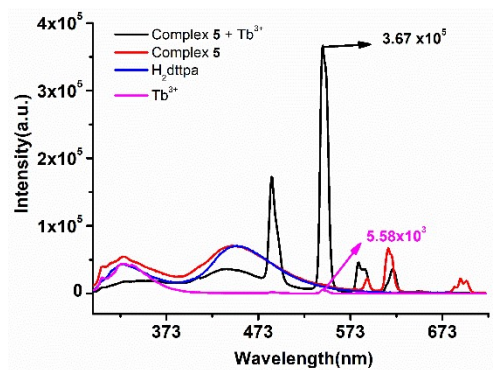

Fig. S14 Luminescence spectra of **5** in DMA (5.0 mg dispersed in 50.0 mL of DMA), complex **5** with additional  $Tb^{3+}$ , ligand  $H_2dttpa$  and  $Tb^{3+}$  in DMA.

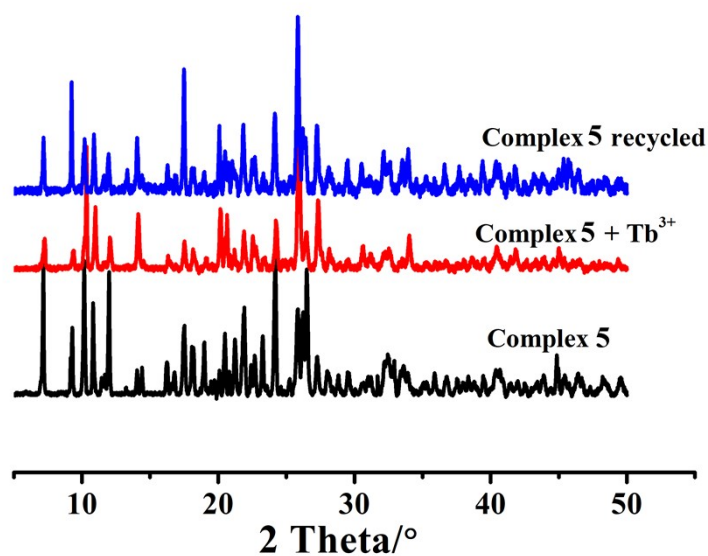

Fig. S15 PXRD of complex **5**, the solid samples after sensing  $Tb^{3+}$  ions and after the 5 cycle experiments.

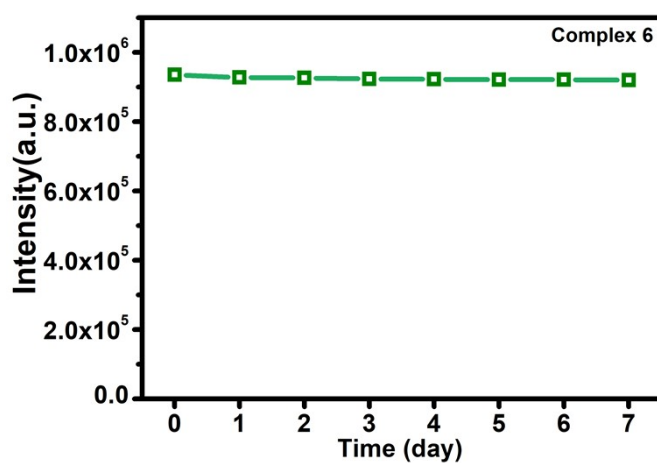

Fig. S16 The stability for complex **6** in  $CH_3CN$  for 7 days.

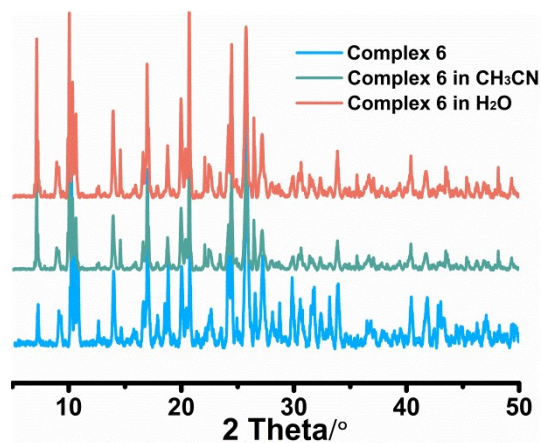

Fig. S17 PXRD of complex 6 and complex 6 in  $\text{CH}_3\text{CN}$  and  $\text{H}_2\text{O}$  for 7 days.

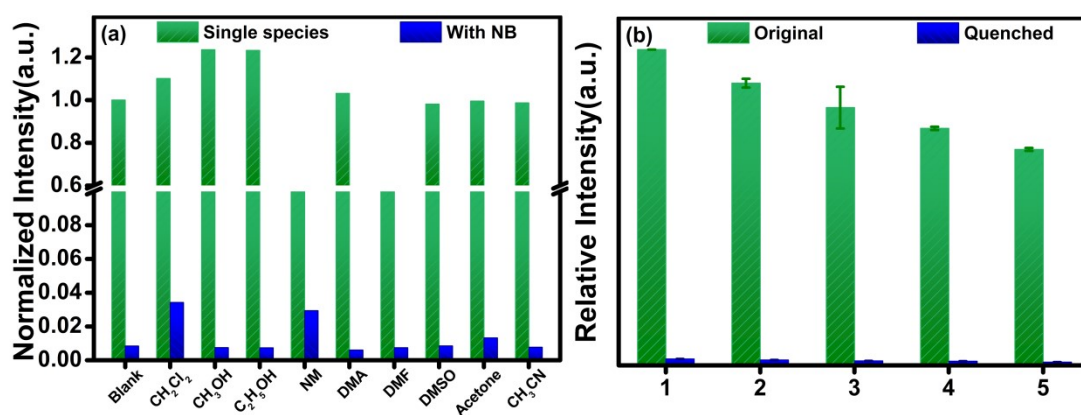

Fig. S18 (a) Interference study of complex 6 (Tb-CP) for sensing NB in the presence of other solvents; (b) Reproducibility of the quenching ability of 6 in  $\text{CH}_3\text{CN}$  and in NB ( $60\ \mu\text{M}$  of NB).

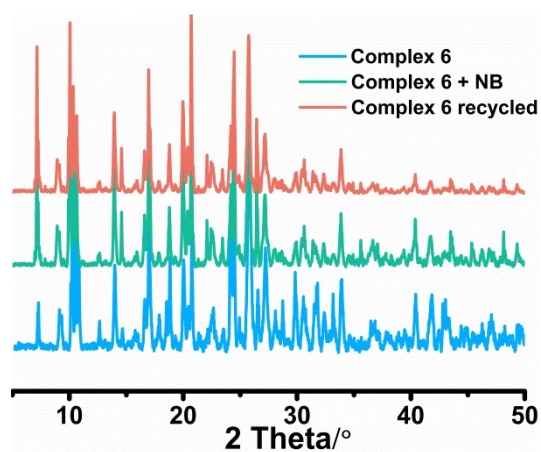

Fig. S19 PXRD of complex 6, the solid samples after sensing NB and after the 5 cycle experiments.

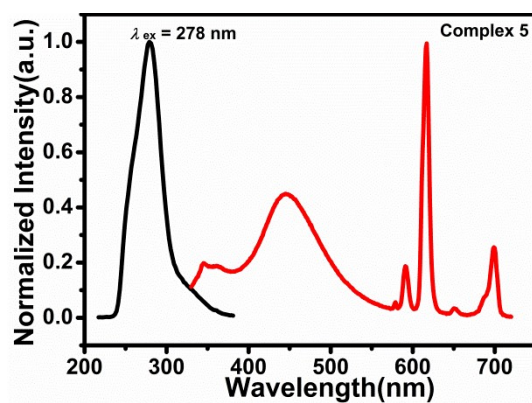

Fig. S20 The excitation and emission spectra of complex **5** in DMA ( $\lambda_{\text{ex}} = 278 \text{ nm}$ )

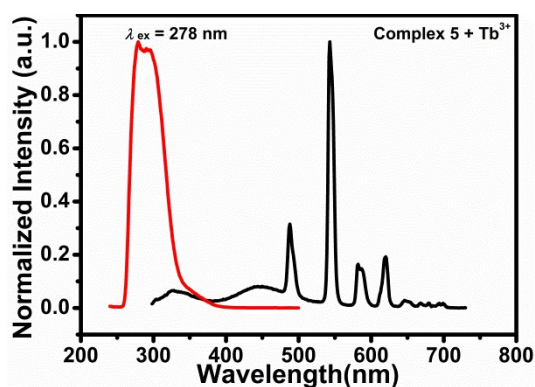

Fig. S21 The excitation and emission spectra of complex **5** in DMA plus  $\text{Tb}^{3+}$  ( $\lambda_{\text{ex}} = 278 \text{ nm}$  with the maximum emission of  $\text{Tb}^{3+}$ )

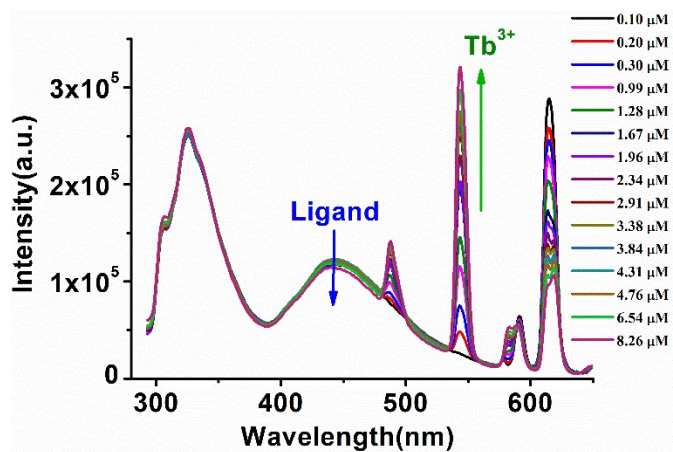

Fig. S22 Two-dimensional luminescence responses of compound **5** toward different concentrations of  $\text{TbCl}_3$  solution.

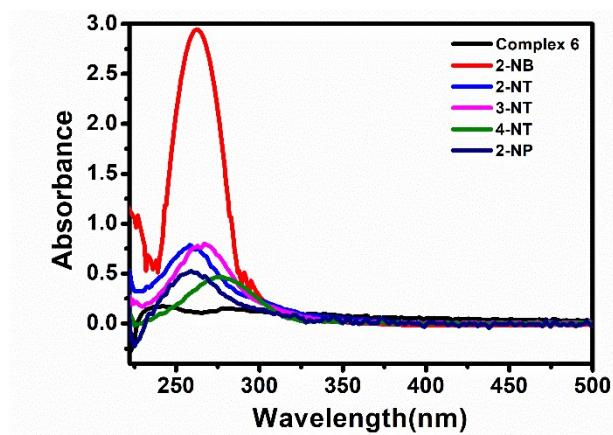

Fig. S23 UV-vis spectra of complex **6** and **6** after adding NB, 2-NT, 2-NP, 3-NT and 4-NT in CH<sub>3</sub>CN.

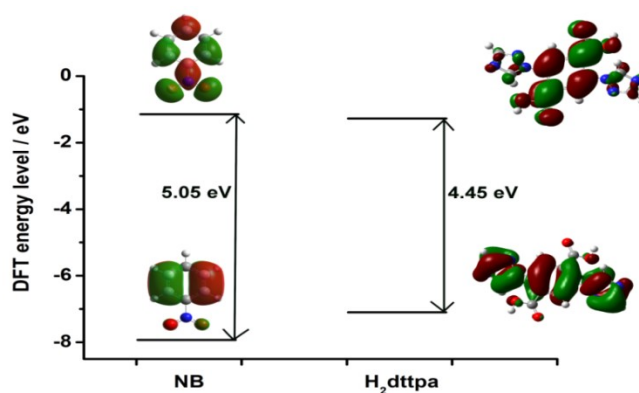

Fig. S24 Energy gap of the HOMO and LUMO for H<sub>2</sub>dttpa and NB.

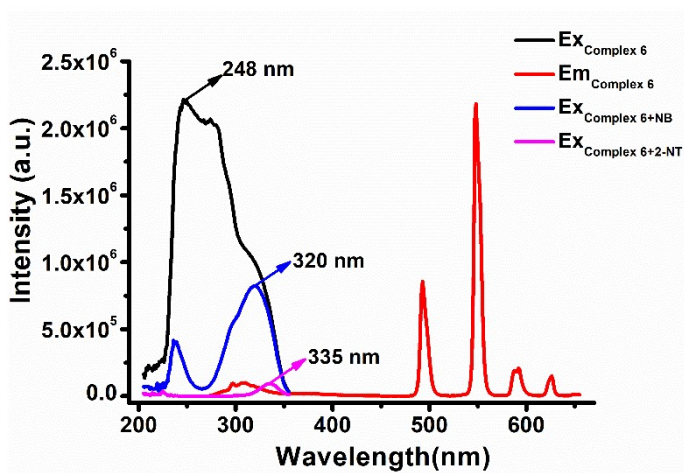

Fig. S25 The excitation spectra of complex **6** in CH<sub>3</sub>CN and **6** in CH<sub>3</sub>CN after adding NB and 2-NT, respectively.

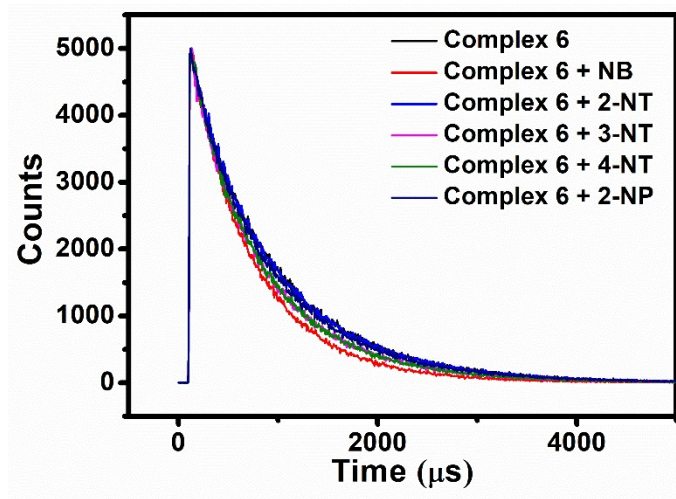

Fig. S26 Lifetime for  $^5D_4$  emission of **6** in  $CH_3CN$  and after adding NB, 2-NT, 2-NP, 3-NT and 4-NT.

Table S1 Crystal data and structure refinement for complexes 1-7

| Comp.     | 1                                 | 2                                 | 3                                 | 4                                 | 5                                 | 6                                 | 7                                 |
|-----------|-----------------------------------|-----------------------------------|-----------------------------------|-----------------------------------|-----------------------------------|-----------------------------------|-----------------------------------|
| CCDC      | 2096052                           | 2096053                           | 2096054                           | 2096055                           | 2096056                           | 2096057                           | 2096058                           |
| Formula   | $C_{18}H_{15}LaN_9O_9$            | $C_{18}H_{15}CeN_9O_9$            | $C_{18}H_{15}NdN_9O_9$            | $C_{18}H_{15}SmN_9O_9$            | $C_{18}H_{15}EuN_9O_9$            | $C_{36}H_{30}N_{18}O_{15.5}Tb_2$  | $C_{36}H_{25}Er_2N_{18}O_{15.5}$  |
| $M_r$     | 640.30                            | 641.51                            | 645.63                            | 651.74                            | 653.35                            | 1275.60                           | 1292.26                           |
| Crystal   | Triclinic                         |
| Space     | $P\bar{1}$                        |
| Temp. (K) | 296 (2)                           | 296 (2)                           | 296 (2)                           | 296 (2)                           | 296 (2)                           | 296 (2)                           | 298 (2)                           |
| Size      | $0.26 \times 0.25 \times$<br>0.24 | $0.26 \times 0.25 \times$<br>0.24 | $0.26 \times 0.25 \times$<br>0.23 | $0.23 \times 0.22 \times$<br>0.20 | $0.26 \times 0.25 \times$<br>0.23 | $0.26 \times 0.24 \times$<br>0.22 | $0.26 \times 0.24 \times$<br>0.23 |
| $a$ (Å)   | 9.5199 (5)                        | 9.4853 (4)                        | 9.4901 (4)                        | 9.4774 (4)                        | 9.4618 (4)                        | 9.3859 (5)                        | 9.3751 (5)                        |
| $b$ (Å)   | 10.4152 (6)                       | 10.3887 (5)                       | 10.3535 (5)                       | 10.3232 (4)                       | 10.3098 (5)                       | 10.4122 (5)                       | 10.3758 (5)                       |
| $c$ (Å)   | 12.6533 (7)                       | 12.6157 (6)                       | 12.5438 (5)                       | 12.4655 (5)                       | 12.4302 (6)                       | 12.1355 (6)                       | 12.0667 (5)                       |

|                                         |              |              |              |              |              |               |               |
|-----------------------------------------|--------------|--------------|--------------|--------------|--------------|---------------|---------------|
| $\alpha$ (°)                            | 84.4347 (15) | 84.4594 (15) | 84.3246 (13) | 84.0976 (13) | 83.9872 (17) | 97.9575 (15)  | 98.0007 (14)  |
| $\beta$ (°)                             | 79.2703 (15) | 79.4366 (14) | 79.5509 (13) | 80.0670 (13) | 80.5410 (18) | 92.8219 (15)  | 93.1898 (14)  |
| $\gamma$ (°)                            | 67.2952 (14) | 67.3666 (14) | 67.1626 (13) | 66.9366 (12) | 66.8943 (16) | 114.2386 (15) | 114.3485 (13) |
| $V$ (Å <sup>3</sup> )                   | 1136.70 (11) | 1127.50 (9)  | 1116.50 (9)  | 1104.45 (8)  | 1099.04 (9)  | 1063.60 (9)   | 1050.62 (9)   |
| Z                                       | 2            | 2            | 2            | 2            | 2            | 1             | 1             |
| $\mu$ (mm <sup>-1</sup> )               | 1.950        | 2.09         | 2.40         | 2.73         | 2.93         | 3.39          | 4.07          |
| $R_{int}$                               | 0.030        | 0.024        | 0.027        | 0.026        | 0.025        | 0.024         | 0.024         |
| GOF                                     | 1.08         | 1.09         | 1.12         | 1.10         | 1.10         | 1.03          | 1.05          |
| $F_{000}$                               | 630          | 632          | 636          | 640          | 642          | 614           | 621           |
| $R_1 [I > 2\sigma(I)]^a$                | 0.023        | 0.014        | 0.015        | 0.017        | 0.021        | 0.014         | 0.014         |
| $\omega R_2 [I > 2\sigma(I)]^b$         | 0.048        | 0.036        | 0.038        | 0.045        | 0.053        | 0.037         | 0.036         |
| $\Delta\rho_{max}$ (e Å <sup>-3</sup> ) | 0.67         | 0.41         | 0.72         | 0.68         | 0.73         | 0.40          | 0.74          |
| $\Delta\rho_{min}$ (e Å <sup>-3</sup> ) | -0.35        | -0.34        | -0.51        | -0.83        | -1.11        | -0.57         | -0.68         |

$$^a R_1 = \frac{\sum |F_o| - \sum |F_c|}{\sum |F_o|}$$

$$^b \omega R_2 = \left[ \frac{\sum \omega (F_o^2 - F_c^2)^2}{\sum \omega (F_o^2)^2} \right]^{1/2}$$

The B alerts in the structures of 1-5 maybe due to the structure, then resulting in the absence of suitable hydrogen bond acceptors.

The B alerts in the structures of 6 and 7 maybe due to the water molecules removed from the SQUEEZE form hydrogen bonds with the H7A around O7.

Table S2 The selected bond lengths and angles of all the complexes

| Complex 1 |             |      |             |
|-----------|-------------|------|-------------|
| Bond      | Distance(Å) | Bond | Distance(Å) |

|                                                          |             |                         |             |
|----------------------------------------------------------|-------------|-------------------------|-------------|
| La1—O5                                                   | 2.4702 (16) | La1—O7                  | 2.5749 (17) |
| La1—O1                                                   | 2.4730 (16) | La1—O3                  | 2.6268 (17) |
| La1—O6 <sup>i</sup>                                      | 2.5283 (16) | La1—O4                  | 2.6520 (17) |
| La1—O2 <sup>i</sup>                                      | 2.5424 (16) | La1—N9 <sup>ii</sup>    | 2.7230 (19) |
| La1—O8                                                   | 2.5613 (18) |                         |             |
| Angle                                                    | Degree(°)   | Angle                   | Degree(°)   |
| O5—La1—O1                                                | 73.93 (6)   | O2 <sup>i</sup> —La1—O8 | 67.22 (6)   |
| O5—La1—O6 <sup>i</sup>                                   | 118.06 (5)  | O5—La1—O7               | 147.06 (6)  |
| O1—La1—O6 <sup>i</sup>                                   | 78.03 (5)   | O1—La1—O7               | 78.23 (6)   |
| O5—La1—O2 <sup>i</sup>                                   | 75.27 (6)   | O6 <sup>i</sup> —La1—O7 | 71.82 (6)   |
| O1—La1—O2 <sup>i</sup>                                   | 118.84 (6)  | O2 <sup>i</sup> —La1—O7 | 135.01 (6)  |
| O6 <sup>i</sup> —La1—O2 <sup>i</sup>                     | 72.08 (6)   | O8—La1—O7               | 127.58 (6)  |
| O5—La1—O8                                                | 70.15 (6)   | O5—La1—O3               | 77.33 (6)   |
| O1—La1—O8                                                | 140.30 (6)  | O1—La1—O3               | 74.25 (5)   |
| O6 <sup>i</sup> —La1—O8                                  | 134.46 (6)  | O6 <sup>i</sup> —La1—O3 | 142.72 (6)  |
| Symmetry codes: (i) -x, -y+2, -z+1; (ii) -x, -y+2, -z+2; |             |                         |             |
| <b>Complex 2</b>                                         |             |                         |             |
| Bond                                                     | Distance(Å) | Bond                    | Distance(Å) |
| Ce1—O5                                                   | 2.4456 (10) | Ce1—O7                  | 2.5491 (12) |
| Ce1—O1                                                   | 2.4533 (10) | Ce1—O3                  | 2.6044 (11) |
| Ce1—O6 <sup>i</sup>                                      | 2.5055 (10) | Ce1—O4                  | 2.6429 (11) |
| Ce1—O2 <sup>i</sup>                                      | 2.5202 (10) | Ce1—N9 <sup>ii</sup>    | 2.6996 (12) |
| Ce1—O8                                                   | 2.5391 (13) |                         |             |
| Angle                                                    | Degree(°)   | Angle                   | Degree(°)   |
| O5—Ce1—O1                                                | 74.34 (4)   | O5—Ce1—O7               | 147.21 (4)  |
| O5—Ce1—O6 <sup>i</sup>                                   | 117.82 (4)  | O1—Ce1—O7               | 77.86 (4)   |
| O1—Ce1—O6 <sup>i</sup>                                   | 77.97 (4)   | O6 <sup>i</sup> —Ce1—O7 | 71.93 (4)   |
| O5—Ce1—O2 <sup>i</sup>                                   | 75.03 (4)   | O2 <sup>i</sup> —Ce1—O7 | 135.01 (4)  |
| O1—Ce1—O2 <sup>i</sup>                                   | 118.89 (4)  | O8—Ce1—O7               | 127.75 (4)  |
| O6 <sup>i</sup> —Ce1—O2 <sup>i</sup>                     | 71.83 (4)   | O5—Ce1—O3               | 77.27 (4)   |
| O5—Ce1—O8                                                | 70.08 (4)   | O1—Ce1—O3               | 74.07 (4)   |



|                                                          |             |                         |             |
|----------------------------------------------------------|-------------|-------------------------|-------------|
| O1—Ce1—O8                                                | 140.60 (4)  | O6 <sup>i</sup> —Ce1—O3 | 142.90 (4)  |
| O6 <sup>i</sup> —Ce1—O8                                  | 134.20 (4)  | O2 <sup>i</sup> —Ce1—O3 | 143.99 (4)  |
| O2 <sup>i</sup> —Ce1—O8                                  | 67.19 (4)   | O8—Ce1—O3               | 82.03 (5)   |
| Symmetry codes: (i) -x, -y+2, -z+1; (ii) -x, -y+2, -z+2; |             |                         |             |
| <b>Complex 3</b>                                         |             |                         |             |
| Bond                                                     | Distance(Å) | Bond                    | Distance(Å) |
| Nd1—O5                                                   | 2.4129 (12) | Nd1—O8                  | 2.5104 (15) |
| Nd1—O1                                                   | 2.4202 (12) | Nd1—O3                  | 2.5698 (13) |
| Nd1—O6 <sup>i</sup>                                      | 2.4717 (12) | Nd1—O4                  | 2.6185 (13) |
| Nd1—O2 <sup>i</sup>                                      | 2.4864 (12) | Nd1—N9 <sup>ii</sup>    | 2.6559 (14) |
| Nd1—O7                                                   | 2.5087 (13) |                         |             |
| Angle                                                    | Degree(°)   | Angle                   | Degree(°)   |
| O5—Nd1—O1                                                | 74.71 (5)   | O5—Nd1—O8               | 69.96 (5)   |
| O5—Nd1—O6 <sup>i</sup>                                   | 117.72 (4)  | O1—Nd1—O8               | 140.92 (5)  |
| O1—Nd1—O6 <sup>i</sup>                                   | 77.61 (4)   | O6 <sup>i</sup> —Nd1—O8 | 134.18 (5)  |
| O5—Nd1—O2 <sup>i</sup>                                   | 74.81 (4)   | O2 <sup>i</sup> —Nd1—O8 | 67.08 (5)   |
| O1—Nd1—O2 <sup>i</sup>                                   | 118.81 (4)  | O7—Nd1—O8               | 127.96 (5)  |
| O6 <sup>i</sup> —Nd1—O2 <sup>i</sup>                     | 71.88 (4)   | O5—Nd1—O3               | 76.69 (4)   |
| O5—Nd1—O7                                                | 147.06 (4)  | O1—Nd1—O3               | 74.07 (4)   |
| O1—Nd1—O7                                                | 77.41 (5)   | O6 <sup>i</sup> —Nd1—O3 | 143.15 (5)  |
| O6 <sup>i</sup> —Nd1—O7                                  | 72.07 (4)   | O2 <sup>i</sup> —Nd1—O3 | 143.45 (5)  |
| O2 <sup>i</sup> —Nd1—O7                                  | 135.33 (4)  | O7—Nd1—O3               | 79.08 (5)   |
| Symmetry codes: (i) -x, -y+2, -z+1; (ii) -x, -y+2, -z+2; |             |                         |             |
| <b>Complex 4</b>                                         |             |                         |             |
| Bond                                                     | Distance(Å) | Bond                    | Distance(Å) |
| Sm1—O5                                                   | 2.3805 (14) | Sm1—O4A                 | 2.377 (8)   |
| Sm1—O1                                                   | 2.3902 (14) | Sm1—O8                  | 2.504 (2)   |
| Sm1—O6 <sup>i</sup>                                      | 2.4360 (14) | Sm1—O3                  | 2.5466 (15) |
| Sm1—O2 <sup>i</sup>                                      | 2.4458 (14) | Sm1—O4                  | 2.607 (3)   |
| Sm1—O7                                                   | 2.4680 (15) | Sm1—N9 <sup>ii</sup>    | 2.6231 (17) |
| Angle                                                    | Degree(°)   | Angle                   | Degree(°)   |

|                                                          |             |                         |             |
|----------------------------------------------------------|-------------|-------------------------|-------------|
| O4A—Sm1—O5                                               | 97.0 (4)    | O4A—Sm1—O7              | 82.6 (5)    |
| O5—Sm1—O1                                                | 75.18 (6)   | O5—Sm1—O7               | 147.07 (5)  |
| O4A—Sm1—O6 <sup>i</sup>                                  | 143.4 (4)   | O1—Sm1—O7               | 77.80 (6)   |
| O5—Sm1—O6 <sup>i</sup>                                   | 118.41 (5)  | O6 <sup>i</sup> —Sm1—O7 | 72.62 (5)   |
| O1—Sm1—O6 <sup>i</sup>                                   | 77.31 (5)   | O2 <sup>i</sup> —Sm1—O7 | 135.63 (5)  |
| O5—Sm1—O2 <sup>i</sup>                                   | 75.22 (5)   | O4A—Sm1—O8              | 48.4 (5)    |
| O1—Sm1—O2 <sup>i</sup>                                   | 119.38 (5)  | O5—Sm1—O8               | 69.23 (7)   |
| O6 <sup>i</sup> —Sm1—O2 <sup>i</sup>                     | 72.43 (5)   | O1—Sm1—O8               | 140.81 (7)  |
| Symmetry codes: (i) -x, -y+2, -z+1; (ii) -x, -y+2, -z+2. |             |                         |             |
| <b>Complex 5</b>                                         |             |                         |             |
| Bond                                                     | Distance(Å) | Bond                    | Distance(Å) |
| Eu1—O5                                                   | 2.3651 (18) | Eu1—O4A                 | 2.357 (7)   |
| Eu1—O1                                                   | 2.3779 (18) | Eu1—O8                  | 2.511 (3)   |
| Eu1—O6 <sup>i</sup>                                      | 2.4194 (18) | Eu1—O3                  | 2.5415 (19) |
| Eu1—O2 <sup>i</sup>                                      | 2.4274 (17) | Eu1—O4                  | 2.604 (4)   |
| Eu1—O7                                                   | 2.4472 (19) | Eu1—N9 <sup>ii</sup>    | 2.614 (2)   |
| Angle                                                    | Degree(°)   | Angle                   | Degree(°)   |
| O4A—Eu1—O5                                               | 96.0 (4)    | O6 <sup>i</sup> —Eu1—O7 | 73.07 (7)   |
| O5—Eu1—O1                                                | 75.33 (7)   | O2 <sup>i</sup> —Eu1—O7 | 135.81 (7)  |
| O4A—Eu1—O6 <sup>i</sup>                                  | 143.9 (3)   | O4A—Eu1—O8              | 47.6 (4)    |
| O5—Eu1—O6 <sup>i</sup>                                   | 118.87 (6)  | O5—Eu1—O8               | 68.84 (9)   |
| O1—Eu1—O6 <sup>i</sup>                                   | 77.30 (6)   | O1—Eu1—O8               | 140.67 (9)  |
| O5—Eu1—O2 <sup>i</sup>                                   | 75.52 (6)   | O6 <sup>i</sup> —Eu1—O8 | 134.66 (9)  |
| O1—Eu1—O2 <sup>i</sup>                                   | 119.78 (7)  | O2 <sup>i</sup> —Eu1—O8 | 66.29 (9)   |
| O6 <sup>i</sup> —Eu1—O2 <sup>i</sup>                     | 72.76 (7)   | O7—Eu1—O8               | 126.87 (8)  |
| O4A—Eu1—O7                                               | 82.8 (4)    | O5—Eu1—O3               | 75.95 (7)   |
| O5—Eu1—O7                                                | 147.05 (6)  | O1—Eu1—O3               | 74.03 (6)   |
| O1—Eu1—O7                                                | 78.22 (7)   | O6 <sup>i</sup> —Eu1—O3 | 142.73 (7)  |
| Symmetry codes: (i) -x, -y+2, -z+1; (ii) -x, -y+2, -z+2; |             |                         |             |
| <b>Complex 6</b>                                         |             |                         |             |

| Bond                                                | Distance(Å) | Bond                                  | Distance(Å) |
|-----------------------------------------------------|-------------|---------------------------------------|-------------|
| Tb1—O3                                              | 2.2951 (13) | Tb1—O2 <sup>i</sup>                   | 2.3672 (12) |
| Tb1—O1                                              | 2.3470 (13) | Tb1—O7                                | 2.3770 (15) |
| Tb1—O4 <sup>i</sup>                                 | 2.3642 (13) | Tb1—N9 <sup>ii</sup>                  | 2.5585 (15) |
| Tb1—O5                                              | 2.3669 (13) | Tb1—O6                                | 2.5679 (14) |
| Angle                                               | Degree(°)   | Angle                                 | Degree(°)   |
| O3—Tb1—O1                                           | 77.03 (5)   | O3—Tb1—O7                             | 83.24 (6)   |
| O3—Tb1—O4 <sup>i</sup>                              | 122.93 (5)  | O1—Tb1—O7                             | 144.65 (5)  |
| O1—Tb1—O4 <sup>i</sup>                              | 76.45 (5)   | O4 <sup>i</sup> —Tb1—O7               | 138.56 (5)  |
| O3—Tb1—O5                                           | 130.46 (5)  | O5—Tb1—O7                             | 90.00 (6)   |
| O1—Tb1—O5                                           | 81.22 (5)   | O2 <sup>i</sup> —Tb1—O7               | 78.83 (5)   |
| O4 <sup>i</sup> —Tb1—O5                             | 93.52 (5)   | O3—Tb1—N9 <sup>ii</sup>               | 146.80 (5)  |
| O3—Tb1—O2 <sup>i</sup>                              | 78.04 (5)   | O1—Tb1—N9 <sup>ii</sup>               | 135.38 (5)  |
| O1—Tb1—O2 <sup>i</sup>                              | 124.11 (5)  | O4 <sup>i</sup> —Tb1—N9 <sup>ii</sup> | 70.35 (5)   |
| O4 <sup>i</sup> —Tb1—O2 <sup>i</sup>                | 76.75 (5)   | O5—Tb1—N9 <sup>ii</sup>               | 72.14 (5)   |
| O5—Tb1—O2 <sup>i</sup>                              | 148.27 (5)  | O2 <sup>i</sup> —Tb1—N9 <sup>ii</sup> | 76.15 (5)   |
| Symmetry codes: (i) -x+1, -y, -z+1; (ii) x, y-1, z; |             |                                       |             |
| <b>Complex 7</b>                                    |             |                                       |             |
| Bond                                                | Distance(Å) | Bond                                  | Distance(Å) |
| Er1—O3                                              | 2.2625 (13) | Er1—O2 <sup>i</sup>                   | 2.3329 (13) |
| Er1—O1                                              | 2.3103 (13) | Er1—O7                                | 2.3363 (15) |
| Er1—O4 <sup>i</sup>                                 | 2.3264 (13) | Er1—N9 <sup>ii</sup>                  | 2.5204 (15) |
| Er1—O5                                              | 2.3293 (14) | Er1—O6                                | 2.5603 (15) |
| Angle                                               | Degree(°)   | Angle                                 | Degree(°)   |
| O3—Er1—O1                                           | 77.33 (5)   | O5—Er1—O2 <sup>i</sup>                | 148.59 (5)  |
| O3—Er1—O4 <sup>i</sup>                              | 122.97 (5)  | O3—Er1—O7                             | 82.33 (6)   |
| O1—Er1—O4 <sup>i</sup>                              | 76.25 (5)   | O1—Er1—O7                             | 144.17 (5)  |
| O3—Er1—O5                                           | 130.21 (5)  | O4 <sup>i</sup> —Er1—O7               | 139.31 (5)  |
| O1—Er1—O5                                           | 80.85 (5)   | O5—Er1—O7                             | 90.47 (6)   |
| O4 <sup>i</sup> —Er1—O5                             | 93.64 (5)   | O2 <sup>i</sup> —Er1—O7               | 79.13 (5)   |
| O3—Er1—O2 <sup>i</sup>                              | 78.09 (5)   | O3—Er1—N9 <sup>ii</sup>               | 146.54 (5)  |

|                                                        |            |                                       |            |
|--------------------------------------------------------|------------|---------------------------------------|------------|
| O1—Er1—O2 <sup>i</sup>                                 | 123.97 (5) | O1—Er1—N9 <sup>ii</sup>               | 135.43 (5) |
| O4 <sup>i</sup> —Er1—O2 <sup>i</sup>                   | 76.51 (5)  | O4 <sup>i</sup> —Er1—N9 <sup>ii</sup> | 70.79 (5)  |
| Symmetry codes: (i) $-x+1, -y, -z+1$ ; (ii) $x, y-1$ . |            |                                       |            |

Table S3 Hydrogen-bond geometry (Å, °) for complexes 1-7

| Complex 1                                                                   |       |             |             |               |
|-----------------------------------------------------------------------------|-------|-------------|-------------|---------------|
| $D-H\cdots A$                                                               | $D-H$ | $H\cdots A$ | $D\cdots A$ | $D-H\cdots A$ |
| O7—H7A $\cdots$ O4                                                          | 0.82  | 2.30        | 2.794 (2)   | 119           |
| O7—H7B $\cdots$ N3 <sup>vii</sup>                                           | 0.82  | 1.93        | 2.731 (3)   | 167           |
| O8—H8A $\cdots$ O9A <sup>viii</sup>                                         | 0.82  | 1.91        | 2.731 (8)   | 174           |
| O9A—H9A $\cdots$ N6A <sup>ix</sup>                                          | 0.83  | 2.30        | 2.964 (11)  | 138           |
| O9A—H9A $\cdots$ N6B <sup>ix</sup>                                          | 0.83  | 2.05        | 2.710 (15)  | 136           |
| O9A—H9B $\cdots$ O8 <sup>vii</sup>                                          | 0.83  | 2.05        | 2.731 (8)   | 139           |
| Symmetry codes: (vii) $x+1, y, z$ ; (viii) $x-1, y, z$ ; (ix) $x, y, z+1$ . |       |             |             |               |
| Complex 2                                                                   |       |             |             |               |
| $D-H\cdots A$                                                               | $D-H$ | $H\cdots A$ | $D\cdots A$ | $D-H\cdots A$ |
| O9A—H9B $\cdots$ O8 <sup>viii</sup>                                         | 0.82  | 2.06        | 2.732 (6)   | 139           |
| O9A—H9A $\cdots$ N6B <sup>vii</sup>                                         | 0.83  | 2.06        | 2.727 (11)  | 137           |
| O9A—H9A $\cdots$ N6A <sup>vii</sup>                                         | 0.83  | 2.29        | 2.953 (9)   | 137           |
| O8—H8A $\cdots$ O9A <sup>vi</sup>                                           | 0.82  | 1.92        | 2.732 (6)   | 174           |
| O7—H7B $\cdots$ N3 <sup>viii</sup>                                          | 0.82  | 1.93        | 2.7310 (18) | 168           |
| O7—H7A $\cdots$ O4                                                          | 0.82  | 2.29        | 2.7818 (17) | 120           |
| Symmetry codes: (vi) $x-1, y, z$ ; (vii) $x, y, z+1$ ; (viii) $x+1, y, z$ ; |       |             |             |               |
| Complex 3                                                                   |       |             |             |               |
| $D-H\cdots A$                                                               | $D-H$ | $H\cdots A$ | $D\cdots A$ | $D-H\cdots A$ |
| O7—H7A $\cdots$ O4                                                          | 0.81  | 2.26        | 2.7596 (19) | 120           |
| O7—H7B $\cdots$ N3 <sup>vii</sup>                                           | 0.82  | 1.92        | 2.728 (2)   | 168           |
| O8—H8A $\cdots$ O9A <sup>viii</sup>                                         | 0.81  | 1.90        | 2.709 (6)   | 174           |
| O9A—H9A $\cdots$ N6A <sup>ix</sup>                                          | 0.82  | 2.28        | 2.935 (9)   | 138           |
| O9A—H9A $\cdots$ N6B <sup>ix</sup>                                          | 0.82  | 2.05        | 2.702 (13)  | 136           |

|                                                                             |       |              |              |                |
|-----------------------------------------------------------------------------|-------|--------------|--------------|----------------|
| $O9A-H9B \cdots O8^{vii}$                                                   | 0.82  | 2.03         | 2.709 (6)    | 139            |
| Symmetry codes: (vii) $x+1, y, z$ ; (viii) $x-1, y, z$ ; (ix) $x, y, z+1$ . |       |              |              |                |
| Complex 4                                                                   |       |              |              |                |
| $D-H \cdots A$                                                              | $D-H$ | $H \cdots A$ | $D \cdots A$ | $D-H \cdots A$ |
| $O9B-H9B \cdots O8^{viii}$                                                  | 0.94  | 2.01         | 2.624 (14)   | 121            |
| $O9B-H9C \cdots O4A^{viii}$                                                 | 0.82  | 1.57         | 2.39 (2)     | 172            |
| $O9A-H9B \cdots O8^{viii}$                                                  | 0.82  | 2.01         | 2.673 (5)    | 138            |
| $O9A-H9A \cdots N6B^{vii}$                                                  | 0.82  | 2.05         | 2.693 (14)   | 135            |
| $O8-H8A \cdots O9B^{vi}$                                                    | 0.81  | 1.89         | 2.624 (14)   | 150            |
| $O8-H8A \cdots O9A^{vi}$                                                    | 0.81  | 1.87         | 2.673 (5)    | 172            |
| $O7-H7B \cdots N3^{viii}$                                                   | 0.82  | 1.91         | 2.721 (3)    | 169            |
| $O7-H7A \cdots O4$                                                          | 0.81  | 2.23         | 2.729 (4)    | 120            |
| Symmetry codes: (vi) $x-1, y, z$ ; (vii) $x, y, z+1$ ; (viii) $x+1, y, z$ ; |       |              |              |                |
| Complex 5                                                                   |       |              |              |                |
| $D-H \cdots A$                                                              | $D-H$ | $H \cdots A$ | $D \cdots A$ | $D-H \cdots A$ |
| $O9B-H9B \cdots O8^{viii}$                                                  | 0.96  | 2.01         | 2.65 (3)     | 122            |
| $O9B-H9C \cdots O4A^{viii}$                                                 | 0.82  | 1.63         | 2.45 (3)     | 172            |
| $O9A-H9B \cdots O8^{viii}$                                                  | 0.82  | 2.01         | 2.667 (5)    | 137            |
| $O9A-H9A \cdots N6B^{vii}$                                                  | 0.81  | 2.03         | 2.666 (16)   | 135            |
| $O9A-H9A \cdots N6A^{vii}$                                                  | 0.81  | 2.27         | 2.915 (9)    | 137            |
| $O8-H8A \cdots O9B^{vi}$                                                    | 0.81  | 1.91         | 2.65 (3)     | 151            |
| $O8-H8A \cdots O9A^{vi}$                                                    | 0.81  | 1.86         | 2.667 (5)    | 170            |
| $O7-H7B \cdots N3^{viii}$                                                   | 0.82  | 1.91         | 2.717 (3)    | 170            |
| Symmetry codes: (vi) $x-1, y, z$ ; (vii) $x, y, z+1$ ; (viii) $x+1, y, z$ ; |       |              |              |                |
| Complex 6                                                                   |       |              |              |                |

|                                                                                       |       |             |             |               |
|---------------------------------------------------------------------------------------|-------|-------------|-------------|---------------|
| $D-H\cdots A$                                                                         | $D-H$ | $H\cdots A$ | $D\cdots A$ | $D-H\cdots A$ |
| O8—H8A $\cdots$ O8 <sup>i</sup>                                                       | 0.85  | 2.02        | 2.570 (10)  | 122           |
| O8—H8A $\cdots$ N6 <sup>ii</sup>                                                      | 0.85  | 2.49        | 2.953 (5)   | 115           |
| O7—H7B $\cdots$ N3 <sup>viii</sup>                                                    | 0.81  | 1.93        | 2.734 (2)   | 173           |
| O7—H7A $\cdots$ O8                                                                    | 0.82  | 1.98        | 2.739 (5)   | 153           |
| Symmetry codes: (i) $-x+2, -y, -z+2$ ; (ii) $x, y-1, z$ ; (viii) $-x+2, -y+1, -z+1$ . |       |             |             |               |
| Complex 7                                                                             |       |             |             |               |
| $D-H\cdots A$                                                                         | $D-H$ | $H\cdots A$ | $D\cdots A$ | $D-H\cdots A$ |
| O8—H8A $\cdots$ O8 <sup>viii</sup>                                                    | 0.85  | 2.04        | 2.578 (10)  | 121           |
| O8—H8A $\cdots$ N6 <sup>ii</sup>                                                      | 0.85  | 2.46        | 2.923 (5)   | 115           |
| O7—H7B $\cdots$ N3 <sup>v</sup>                                                       | 0.81  | 1.93        | 2.739 (2)   | 174           |
| O7—H7A $\cdots$ O8                                                                    | 0.82  | 1.98        | 2.735 (5)   | 153           |
| Symmetry codes: (ii) $x, y-1, z$ ; (v) $-x+2, -y+1, -z+1$ ; (viii) $-x+2, -y, -z+2$ ; |       |             |             |               |

Table S4 Quantum yields of Eu-CP, Eu-CP after loaded Tb<sup>3+</sup> and Tb-CP.

| Sample                   | Quantum yield |
|--------------------------|---------------|
| Eu-CP                    | 17 %          |
| Tb <sup>3+</sup> @ Eu-CP | 4 %           |
| Tb-CP                    | 15 %          |

Table S5 The detection limitation of complex **5** in this paper and of previously reported compounds for the detection of Tb<sup>3+</sup>

| No. | Complex                                                                                                     | Analyte          | LOD(nM)             | Media                        | Ref              |
|-----|-------------------------------------------------------------------------------------------------------------|------------------|---------------------|------------------------------|------------------|
| 1   | [(CH <sub>3</sub> ) <sub>2</sub> NH <sub>2</sub> ] <sub>2</sub> [Cd <sub>3</sub> (BPTC) <sub>2</sub> ](DMF) | Tb <sup>3+</sup> | 1.0×10 <sup>4</sup> | DMF                          | S1               |
| 2   | (Cd <sub>3</sub> (L) <sub>2.5</sub> (4-PTZ)(DMF) <sub>3</sub>                                               | Tb <sup>3+</sup> | 10                  | DMF                          | S2               |
| 3   | [Zn <sub>3</sub> (L)(DCTP) <sub>3</sub> ] <sub>n</sub>                                                      | Tb <sup>3+</sup> | 11.5                | Ethanol–<br>H <sub>2</sub> O | S3               |
| 4   | cy(WQETR)                                                                                                   | Tb <sup>3+</sup> | 5×10 <sup>4</sup>   | Tris<br>buffer               | S4               |
| 5   | PPH                                                                                                         | Tb <sup>3+</sup> | 56                  | --                           | S5               |
| 4   | {[Eu(dttpa) <sub>1.5</sub> (H <sub>2</sub> O) <sub>2</sub> ] $\cdot$ H <sub>2</sub> O} <sub>n</sub>         | Tb <sup>3+</sup> | 9.88                | DMA                          | Complex <b>5</b> |

Table S6 The detection limitation of complex **6** in this paper and of previously reported compounds for the detection of nitrobenzene (NB)

| No. | Complex                                                                     | Analyte | $K_{SV}/M^{-1}$            | LOD(nM)            | Media                           | Ref |
|-----|-----------------------------------------------------------------------------|---------|----------------------------|--------------------|---------------------------------|-----|
| 1   | $\{[Eu(L)(DMF)(H_2O)] \cdot 0.5DMF\}_n$                                     | NB      | $4.74 \times 10^6$         | $1.38 \times 10^3$ | DMF                             | S6  |
| 2   | $[Eu(L)(DEF)(H_2O)]_n$                                                      | NB      | $1.20 \times 10^6$         | $1.09 \times 10^4$ | DMF                             | S6  |
| 3   | EuL                                                                         | NB      | 302                        | $1.0 \times 10^3$  | DMF                             | S7  |
| 4   | TbL                                                                         | NB      | 320                        | $5.0 \times 10^3$  | DMF                             | S7  |
| 5   | <b>2a</b>                                                                   | NB      | $2.14 \times 10^4$         | --                 | DMF                             | S8  |
| 6   | <b>2b</b>                                                                   | NB      | $2.48 \times 10^4$         | --                 | DMF                             | S8  |
| 7   | Porous Silicon                                                              | NB      | --                         | $5.0 \times 10^3$  | Air                             | S9  |
| 8   | OMCN-x                                                                      | NB      | --                         | $1.8 \times 10^5$  | PBS                             | S10 |
| 9   | $\{[Zn(L)] \cdot DMA\}_n$ (1)                                               | NB      | --                         | $7.5 \times 10^3$  | DMF                             | S11 |
| 10  | 1-Eu                                                                        | NB      | --                         | --                 | DMF                             | S12 |
| 11  | 3                                                                           | NB      | $2.7 \times 10^3$          | $2.54 \times 10^6$ | DMA                             | S13 |
| 12  | $\{[Cd(tdc)(hedn)(H_2O)] \cdot 3H_2O\}_n$                                   | NB      | $2.5 \times 10^5$          | $6.7 \times 10^6$  | DMSO+EtOH                       | S14 |
| 13  | $\{[Cd(tdc)(hdin)(H_2O)] \cdot H_2O\}_n$                                    | NB      | $6.4 \times 10^5$          | --                 | --                              | S14 |
| 14  | $\{[Cd_2(tdc)(hdn)(H_2O)_4] \cdot H_2O\}_n$                                 | NB      | $8.4 \times 10^5$          | --                 | --                              | S14 |
| 15  | $\{[Cd_2(tdc)(pdn)(H_2O)_2] \cdot 4H_2O\}_n$                                | NB      | $4.1 \times 10^5$          | --                 | --                              | S14 |
| 16  | $[Cd(tdc)(pdin)]_n$                                                         | NB      | $7.4 \times 10^5$          | --                 | --                              | S14 |
| 17  | $Eu_2Ti_4(\mu_2-O)_2(\mu_3-O)_4(phen)_2(tbza)^{10} \cdot 4CH_3CN$           | NB      | 0.095 (ppm <sup>-1</sup> ) | 10.5               | CH <sub>2</sub> Cl <sub>2</sub> | S15 |
| 18  | Au-NPs                                                                      | NB      | --                         | 16.0               | --                              | S16 |
| 19  | IFMC-36-Eu                                                                  | NB      | --                         | $1.0 \times 10^4$  | DMA                             | S17 |
| 20  | IFMC-3                                                                      | NB      | --                         | --                 | DMA                             | S18 |
| 21  | $\{[Cd(dms)(4-pmina)] \cdot 2.5H_2O\}_n$                                    | NB      | --                         | --                 | DMSO+EtOH                       | S19 |
| 22  | UiO-66-NH <sub>2</sub>                                                      | NB      | --                         | $0.9 \times 10^3$  | Trizma base                     | S20 |
| 23  | $[NH_2(CH_3)_2]_2[Cd_{17}(L)_{12}(\mu_3-O)_4(DMF)_2(H_2O)_2] \cdot solvent$ | NB      | --                         | 135                | DMF                             | S21 |

|    |                                                                                   |    |                      |                      |                    |           |
|----|-----------------------------------------------------------------------------------|----|----------------------|----------------------|--------------------|-----------|
| 24 | [Zn <sub>3</sub> (TDPAT)(H <sub>2</sub> O) <sub>3</sub> ]                         | NB | --                   | 5.0×10 <sup>4</sup>  | Methanol           | S22       |
| 25 | Tb-1                                                                              | NB | 5.61×10 <sup>3</sup> | 1.0×10 <sup>5</sup>  | EtOH               | S23       |
| 26 | Tb- MOF                                                                           | NB | 6.03×10 <sup>5</sup> | 41.4                 | H <sub>2</sub> O   | S24       |
| 27 | M-15/OA                                                                           | NB | --                   | 1.22×10 <sup>3</sup> | H <sub>2</sub> O   | S25       |
| 28 | Tb- MOF                                                                           | NB | --                   | 40.6                 | DMF                | S26       |
| 29 | Complex 1                                                                         | NB | 6.55×10 <sup>3</sup> | 1.13×10 <sup>4</sup> | EtOH               | S27       |
| 30 | Complex 1                                                                         | NB | 1.19×10 <sup>5</sup> | 147                  | EtOH               | S28       |
| 30 | Complex 2                                                                         | NB | 5.13×10 <sup>5</sup> | 1142                 | EtOH               | S28       |
| 30 | Complex 3                                                                         | NB | 6.18×10 <sup>5</sup> | 33.0                 | EtOH               | S28       |
| 30 | Complex 4                                                                         | NB | 2.62×10 <sup>5</sup> | 192                  | EtOH               | S28       |
| 31 | {[Tb(dtppa) <sub>1.5</sub> (H <sub>2</sub> O)]·0.42H <sub>2</sub> O} <sub>n</sub> | NB | 5.6×10 <sup>6</sup>  | 12.5                 | CH <sub>3</sub> CN | Complex 6 |

Table S7 Lifetime for <sup>5</sup>D<sub>4</sub> emission of **6** and after adding NB, 2-NT, 2-NP, 3-NT and 4-NT.

| Sample         | τ <sub>1</sub> (μs) | Rel <sub>1</sub> % | τ <sub>2</sub> (μs) | Rel <sub>2</sub> % | τ (μs) |
|----------------|---------------------|--------------------|---------------------|--------------------|--------|
| Complex 6      | 310                 | 5.47               | 917                 | 94.54              | 884    |
| Complex 6+NB   | 529                 | 45.52              | 808                 | 54.48              | 681    |
| Complex 6+2-NT | 412                 | 9.86               | 928                 | 90.14              | 877    |
| Complex 6+3-NT | 462                 | 21.91              | 887                 | 78.09              | 794    |
| Complex 6+4-NT | 411                 | 17.11              | 859                 | 82.89              | 782    |
| Complex 6+2-NP | 436                 | 14.17              | 918                 | 85.83              | 850    |

## References:

- S1 S. -M. Chen and T.-T. Lian, *Inorg. Chem. Comm.*, 2011, **14**, 447-449.
- S2 F. -Y. Yi, M. L. Gu, S. -C. Wang, J. -Q. Zheng, L. Q. Pan and L Han. *Inorg. Chem.* 2018, **57**, 2654-2662.
- S3 M.-M. Fu, L. S. Fu and G.-H. Cui, *Dalton Trans*, 2021, **50**, 10180- 10186.
- S4 F. Ji, S. Shao, Z. Li, S. Wang, R. Chaudhuri, Z. Guo, N. Perkins, P. Sarkar and M. Xue, *Analyst*. 2021, **146**, 3474-3481.
- S5 H. Zamani, M. Ranjkesh, M. R. Abedi, *Int. J. Electrochem. Sci.* 2014, **9**, 8435–8445.
- S6 R. R. Ma, Z. W. Chen, S. N. Wang, Q. X. Yao, Y. W. Li, J. Lu, D. C. Li, J. M. Dou. *J. Solid State Chem.*, 2017, **252**, 142–151.
- S7 W. Liu, X. Huang, C. Y. Chen, C. Xu, J. X. Ma, L. Z. Yang, W. J. Wang, W. Dou and W. S. Liu. *Chem. Eur. J.* 2019, **25**, 1090-1097.



- S8 M. Z. K. Baig, P. K. Sahu, M. Sarkar and M. Chakravarty. *J. Org. Chem.* 2017, 82, 13359–13367
- S9 S. Content, W. C. Trogler, M. J. Sailor. *Chem. Eur. J.* 2000, 6, 2205-2213.
- S10 Y. F. Zhang, X. X. Bo, A. Nsabimana, C. Luhana, G. Wang, H. Wang, M. Li, L.P. Guo. *Biosens. Bioelectron.*, 2014, 53, 250–256.
- S11 D. M. Chen, X. -Z. Ma, W. Shi, P. Cheng. *Cryst. Growth Des.* 2015, 15, 3999–4004
- S12 R. -C. Gao, F.-S. Guo, N. -N. Bai, Y. -L. Wu, F. Yang, J. -Y. Liang, Z. -J. Li, Y. -Y. Wang. *Inorg. Chem.* 2016, 55, 11323–11330.
- S13 Y. -T. Yan, J. Liu, G.-P. Yang, F. Zhang, Y.- K. Fan, W. -Y. Zhang, Y. -Y. Wang. *CrystEngComm*, 2018, 20, 477–486.
- S14 J. J. Przybyla, R. L. LaDuca. *Inorganica Chimica Acta*, 2019, 486 , 314–323
- S15 H. Zheng, Y. -K. Deng, M.-Yu Ye, Q. -F. Xu, X. -J. Kong, L. -S. Long, L. -S. Zheng. *Inorg. Chem.* 2020, 59, 12404–12409
- S16 R. Emmanuel, C. Karuppiaha, S. M. Chen, S. Palanisamy, P. Prakash. *J. Hazard. Mater.*, 2014, 279, 117-124.
- S17 S. -R. Zhang, D. -Y. Du, J. -S. Qin, S. -L. Li, W. -W. He, Y. -Q. Lan, Z. -M. Su. *Inorg. Chem.* 2014, 53, 8105–8113.
- S18 J. -S. Qin, S. -J. Bao, P. Li, W. Xie, D. -Y. Du, L. Zhao, Y. -Q. Lan, Z. -M. Su. *Chem. Asian J.* 2014, 9, 749 – 753.
- S19 C.L. White, R. L. LaDuca. *Inorg. Chim. Acta*, 2016, 441, 169–180
- S20 K. Vellingiri, D. W. Boukhvalov, S. K. Pandey, A. Deep, K. -H. Kim. *Sensors. Actuat. B.*, 2017, 245, 305–313.
- S21 D. Tian, Y. Li, R.-Y. Chen, Z. Chang, G.-Y. Wang, X.-H. Bu, J. Mater. Chem.A, 2014, 2, 1465–1470.
- S22 D. Ma, B. Li, X. Zhou, Q. Zhou, K. Liu, G. Zeng, G. Li, Z. Shi, S. Feng. *Chem. Comm.* 2013, 49, 8964–8966.
- S23 Y. H. Pham, V. A. Trush, M. Korabik, V. M. Amirkhanov, P. Gawryszewska. *Dyes and Pigments*, 2021, 186, 108986.
- S24 X. -L. Chen, L. Shang, L. Liu, H. Yang, H. -L. Cui, J. -J. Wang. *Dyes and Pigments*, 2021, 196, 109809.
- S25 X. P. Quan, B. Yan. *J. Hazard. Mater.*, 2022, 427, 127869.
- S26 C. -H. Zhan, D. -P. Huang, Y. Wang, W. -T. Mao, X. -J. Wang, Z. -G. Jiang. *CrystEngComm*, 2021, 23, 2788–2792.
- S27 L. -L. Ren, Y. -Y. Cui, A. -L. Cheng, E. -Q. Gao. *J. Solid. State. Chem.*, 2019, 270, 463–469.
- S28 X. Yang, Y. X Ren, H. M. Chai, X. F. Hou, Z. X. Wang, J. J. Wang. *RSC Adv.*, 2021, 11, 23975–23984.
